# Supplementary material for: Aptamer-Conjugated Polydiacetylene Colorimetric Paper Chip for the Detection of Bacillus thuringiensis Spores
Source: PubMed Central journal article supplement (PMC7308844; doi:10.3390/s20113124), 2020-06-01
Supplement: sensors-20-03124-s001.pdf [file sensors-20-03124-s001.pdf]

Article

# Aptamer-Conjugated Polydiacetylene Colorimetric Paper Chip for the Detection of *Bacillus thuringiensis* Spores

Chaoge Zhou <sup>1</sup>, Taeyeong You <sup>1</sup>, Huisoo Jang <sup>1</sup>, Hyunil Ryu <sup>1</sup>, Eun-Seon Lee <sup>2</sup>, Mi-Hwa Oh <sup>2</sup>, Yun Suk Huh <sup>1</sup>, Sun Min Kim <sup>3,\*</sup> and Tae-Joon Jeon <sup>1,\*</sup>

<sup>1</sup> Department of Biological Engineering and Biohybrid Systems Research Center (BSRC), Inha University, 100 Inha-ro, Michuhol-gu, Incheon 22212, Korea; zhouchaoge1995@gmail.com (C.Z.); cmyu0816@gmail.com (T.Y.); huisoojang@gmail.com (H.J.); hyunil.ryu@gmail.com (H.R.); yunsuk.huh@inha.ac.kr (Y.S.H.)

<sup>2</sup> Animal Production Research and Development Division, National Institute of Animal Science, Jeollabuk-do 55365, Korea; les1023@korea.kr (E.-S.L.); moh@korea.kr (M.-H.O.)

<sup>3</sup> Department of Mechanical Engineering, Inha University, 100 Inha-ro, Michuhol-gu, Incheon 22212, Korea

\* Correspondence: sunmk@inha.ac.kr (S.M.K.); tjeon@inha.ac.kr (T.-J.J.); Tel.: +82-32-860-7328 (S.M.K.); +82-32-860-7511 (T.-J.J.); Fax: +82-32-877-7328 (S.M.K.); +82-32-872-4066 (T.-J.J.)

Received: 14 April 2020; Accepted: 29 May 2020; Published: 1 June 2020

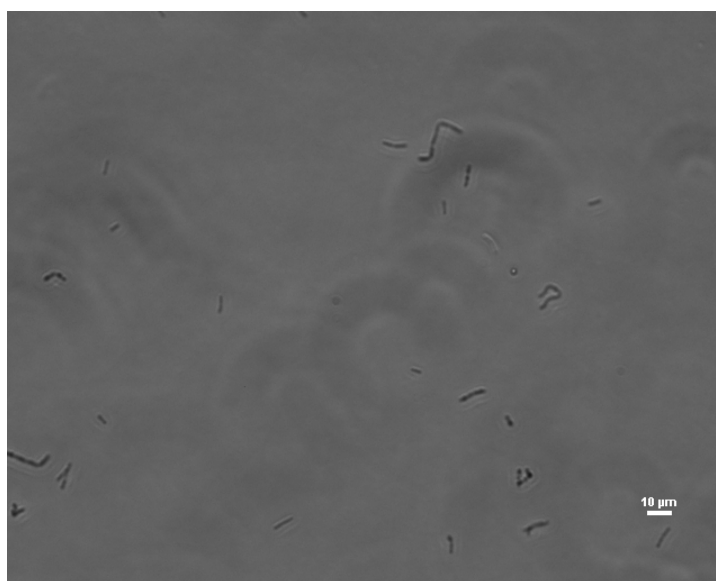

(a)

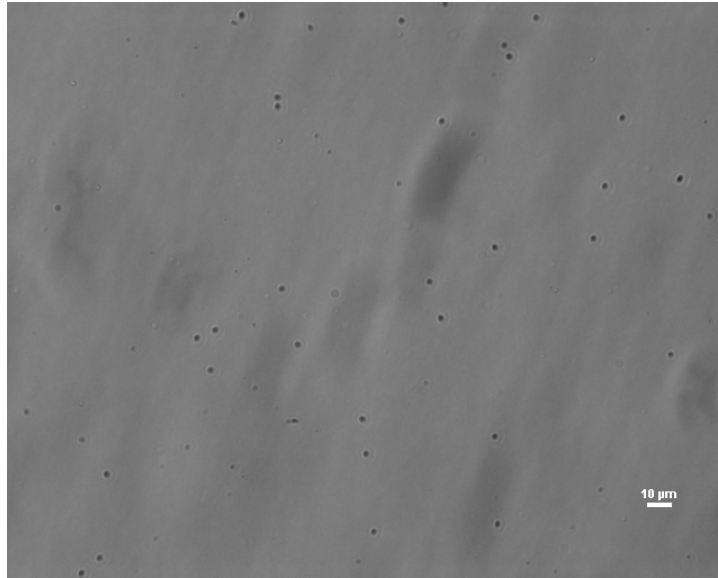

(b)

**Figure S1.** Microscopic images of *Bacillus thuringiensis* (a) and GYS medium cultured *Bacillus thuringiensis* spores; (b) The formation of spores can be confirmed by shape difference.

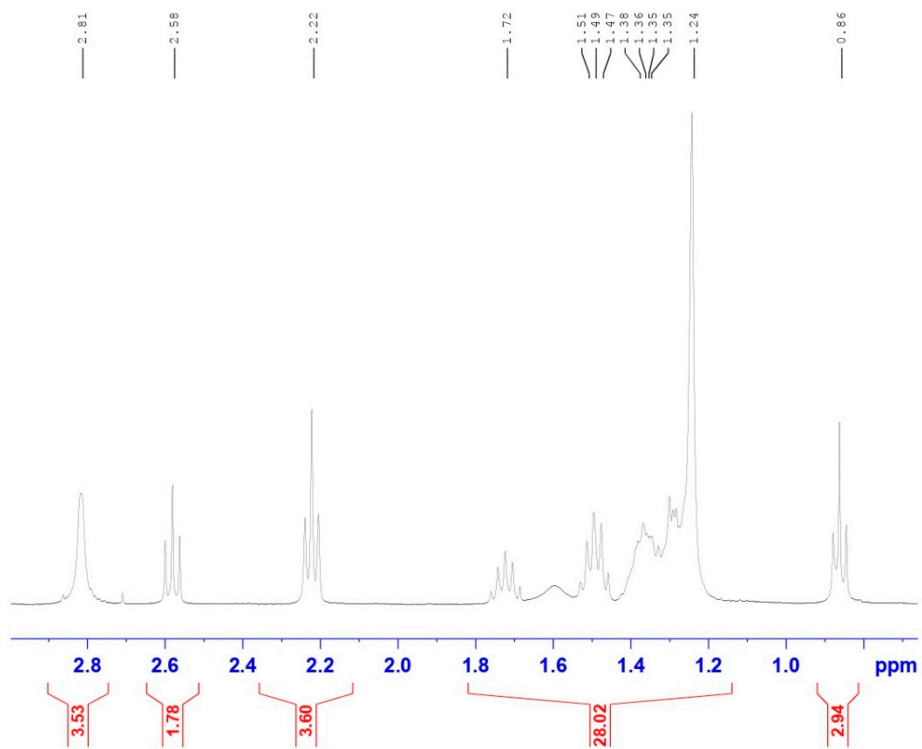

**Figure S2.**  $^1\text{H}$  nuclear magnetic resonance (NMR) spectra of TCDA-NHS. (400 MHz, chloroform- $d$ )  $\delta$  ppm 0.86 (t, 3 H) 1.24–1.79 (m, 28 H) 2.22 (t, 4 H) 2.58 (t, 2 H) 2.81 (s, 4 H); 2.81 (s, 4 H) indicates  $^1\text{H}$  peak of N-hydroxysuccinimide (NHS).

**Table S1.** The RGB values of paper strips after 4 h incubation in different *Bacillus thuringiensis* spore concentrations.

| Sample (CFU/ml)        | Red     | Green   | Blue    |
|------------------------|---------|---------|---------|
| $3 \times 10^7 - 1$    | 154.435 | 154.490 | 208.898 |
| $3 \times 10^7 - 2$    | 82.666  | 116.423 | 162.158 |
| $3 \times 10^7 - 3$    | 205.192 | 133.755 | 119.921 |
| $3 \times 10^8 - 1$    | 177.115 | 162.176 | 202.169 |
| $3 \times 10^8 - 2$    | 87.293  | 100.973 | 162.158 |
| $3 \times 10^8 - 3$    | 137.705 | 121.271 | 138.726 |
| $3 \times 10^9 - 1$    | 179.809 | 157.424 | 191.787 |
| $3 \times 10^9 - 2$    | 101.524 | 105.638 | 140.92  |
| $3 \times 10^9 - 3$    | 205.192 | 133.755 | 119.921 |
| $3 \times 10^{10} - 1$ | 175.550 | 145.488 | 173.686 |
| $3 \times 10^{10} - 2$ | 135.205 | 107.468 | 143.350 |
| $3 \times 10^{10} - 3$ | 164.303 | 151.722 | 169.155 |
| $3 \times 10^{11} - 1$ | 178.749 | 111.172 | 129.571 |
| $3 \times 10^{11} - 2$ | 101.524 | 105.638 | 140.920 |
| $3 \times 10^{11} - 3$ | 151.215 | 121.017 | 129.273 |

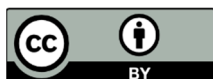

© 2020 by the authors. Licensee MDPI, Basel, Switzerland. This article is an open access article distributed under the terms and conditions of the Creative Commons Attribution (CC BY) license (<http://creativecommons.org/licenses/by/4.0/>).
